# Supplementary material
Source: PubMed Central journal article supplement (PMC4287998)

## ***Supporting Information***

### **Bioactive indole alkaloids isolated from *Alstonia angustifolia***

**Li Pan<sup>a</sup>, Cesar Terrazas<sup>b</sup>, Ulyana Muñoz Acuña<sup>c</sup>, Tran Ngoc Ninh<sup>d</sup>, Heebyung Chai<sup>a</sup>, Esperanza J. Carcache de Blanco<sup>a,c</sup>, Djaja D. Soejarto<sup>e, f</sup>, Abhay R. Satoskar<sup>b</sup> and A. Douglas Kinghorn<sup>a\*</sup>**

<sup>a</sup>*Division of Medicinal Chemistry and Pharmacognosy, College of Pharmacy, The Ohio State University, OH 43210, United States.*

<sup>b</sup>*Department of Pathology, College of Medicine, The Ohio State University, Columbus, OH 43210, United States.*

<sup>c</sup>*Division of Pharmacy Practice and Administration, College of Pharmacy, The Ohio State University, Columbus, OH 43210, United States.*

<sup>d</sup>*Institute of Ecology and Biological Resources, Vietnam Academy of Science and Technology, Hoang Quoc Viet, Cau Giay, Hanoi, Vietnam.*

<sup>e</sup>*Department of Medicinal Chemistry and Pharmacognosy, College of Pharmacy, University of Illinois at Chicago, Chicago, IL 60612, United States.*

<sup>f</sup>*Division of Collections, Field Museum of Natural History, 1400 S. Lake Shore Drive, Chicago, IL 60605, United States*

### Supporting information list.

- Figure S1-1.**  $^1\text{H}$  NMR spectrum of compound **1** ( $\text{CD}_3\text{OD}$ , 400 MHz).
- Figure S1-2.**  $^{13}\text{C}$  DEPT 135 spectrum of compound **1** ( $\text{CD}_3\text{OD}$ , 100 MHz).
- Figure S1-3.**  $^{13}\text{C}$  NMR spectrum of compound **1** ( $\text{CD}_3\text{OD}$ , 100 MHz).
- Figure S1-4.** HSQC spectrum of compound **1** ( $\text{CD}_3\text{OD}$ , 400 MHz).
- Figure S1-5.** HMBC spectrum of compound **1** ( $\text{CD}_3\text{OD}$ , 400 MHz).
- Figure S1-6.**  $^1\text{H}$ - $^1\text{H}$  COSY spectrum of compound **1** ( $\text{CD}_3\text{OD}$ , 400 MHz).
- Figure S1-7.** NOESY spectrum of compound **1** ( $\text{CD}_3\text{OD}$ , 400 MHz).
- Figure S1-8.** TOCSY spectrum of compound **1** ( $\text{CD}_3\text{OD}$ , 400 MHz).
- Figure S1-9.**  $^1\text{H}$  NMR spectrum of compound **2** ( $\text{CD}_3\text{OD}$ , 400 MHz).
- Figure S1-10.**  $^1\text{H}$  NMR spectrum of compound **3** ( $\text{CDCl}_3$ , 400 MHz).
- Figure S1-11.**  $^1\text{H}$  NMR spectrum of compound **4** ( $\text{CDCl}_3$ , 300 MHz).
- Figure S1-12.**  $^1\text{H}$  NMR spectrum of compound **5** ( $\text{DMSO}$ , 400 MHz).
- Figure S1-13.**  $^1\text{H}$  NMR spectrum of compound **6** ( $\text{CDCl}_3$ , 400 MHz).
- Figure S1-14.**  $^1\text{H}$  NMR spectrum of compound **7** ( $\text{CDCl}_3$ , 400 MHz).
- Figure S1-15.**  $^1\text{H}$  NMR spectrum of compound **8** ( $\text{CD}_3\text{OD}$ , 400 MHz).
- Figure S1-16.**  $^1\text{H}$  NMR spectrum of compound **9** ( $\text{CD}_3\text{OD}$ , 400 MHz).
- Figure S1-17.**  $^1\text{H}$  NMR spectrum of compound **10** ( $\text{CDCl}_3$ , 400 MHz).

**Figure S1-1.**  $^1\text{H}$  NMR spectrum of compound **1** ( $\text{CD}_3\text{OD}$ , 400 MHz).

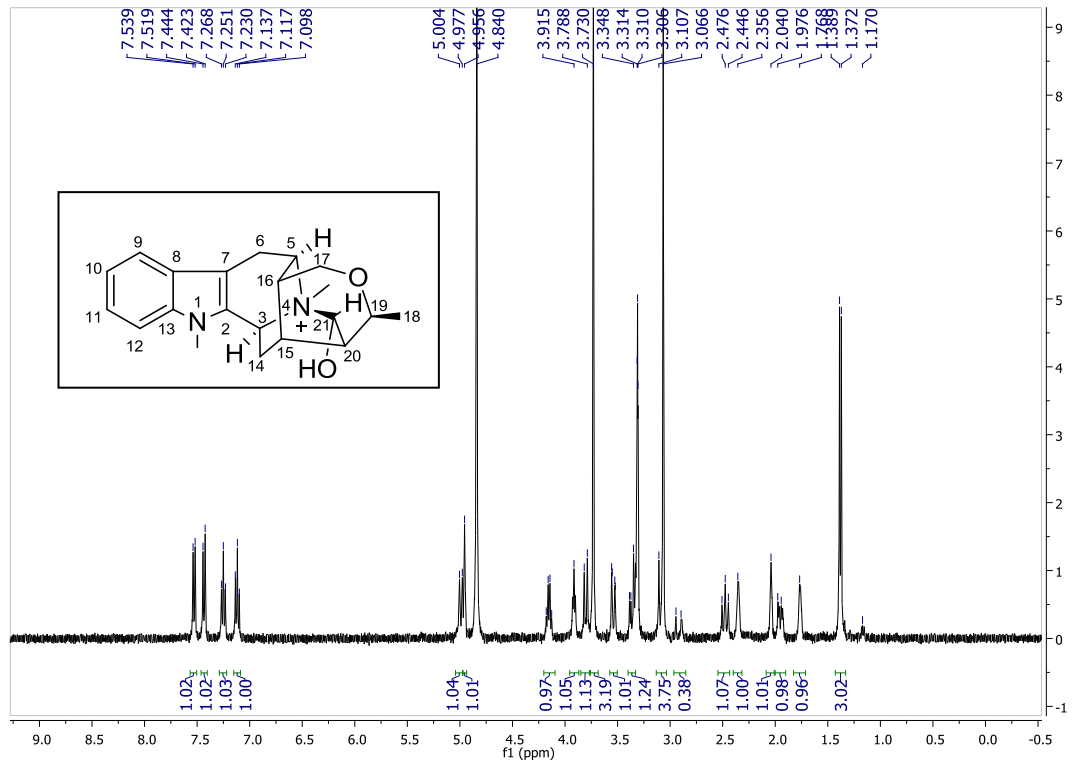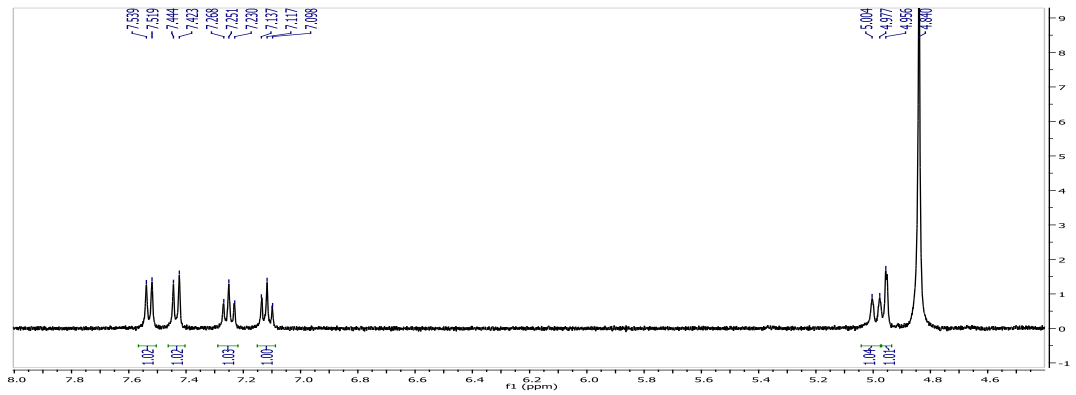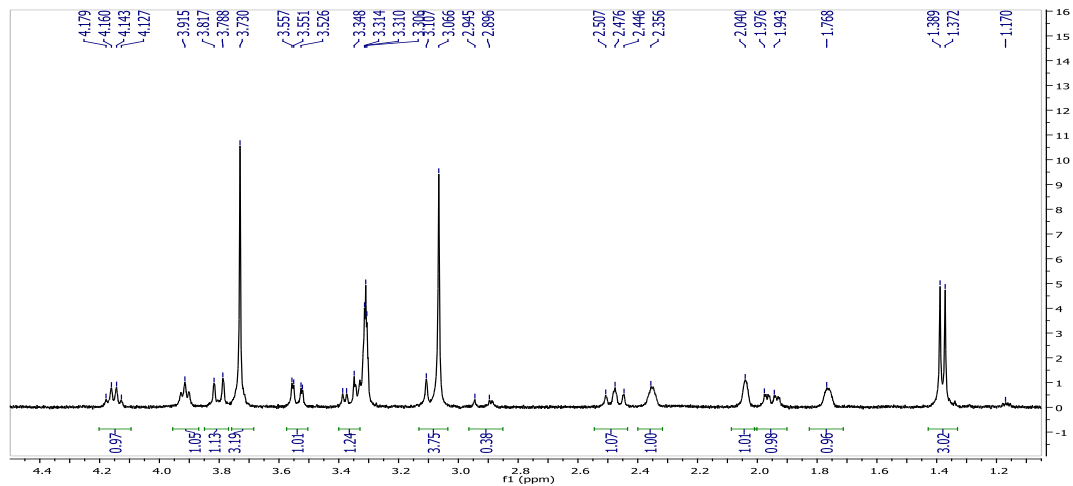

**Figure S1-2.**  $^{13}\text{C}$  DEPT135 spectrum of compound **1** ( $\text{CD}_3\text{OD}$ , 100 MHz).

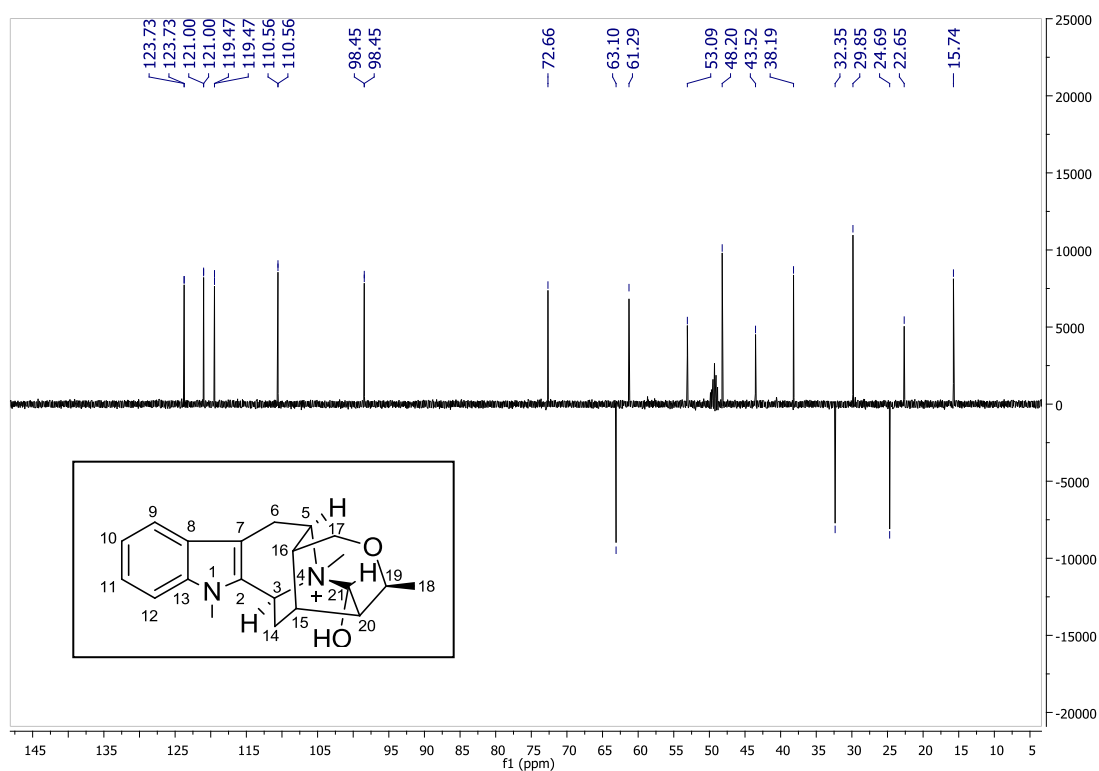

**Figure S1-3.**  $^{13}\text{C}$  NMR spectrum of compound **1** ( $\text{CD}_3\text{OD}$ , 100 MHz).

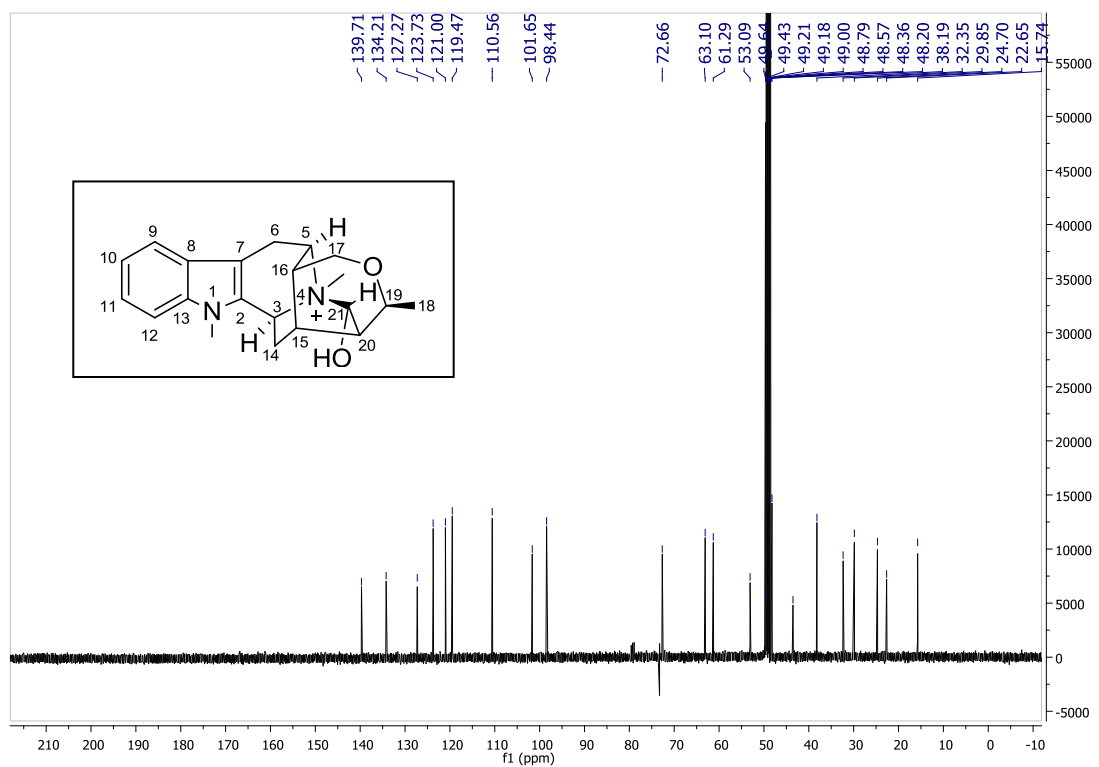

**Figure S1-4.** HSQC spectrum of compound **1** (CD<sub>3</sub>OD , 400, 100 MHz).

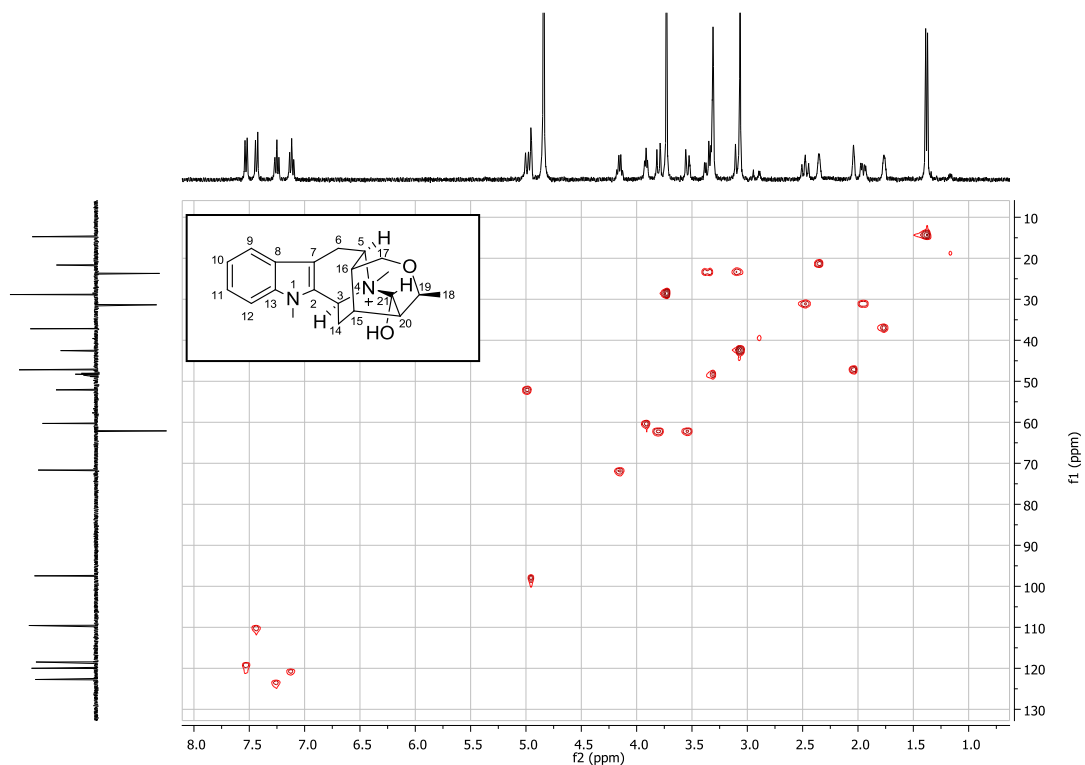

**Figure S1-5.** HMBC spectrum of compound **1** (CD<sub>3</sub>OD , 400, 100 MHz).

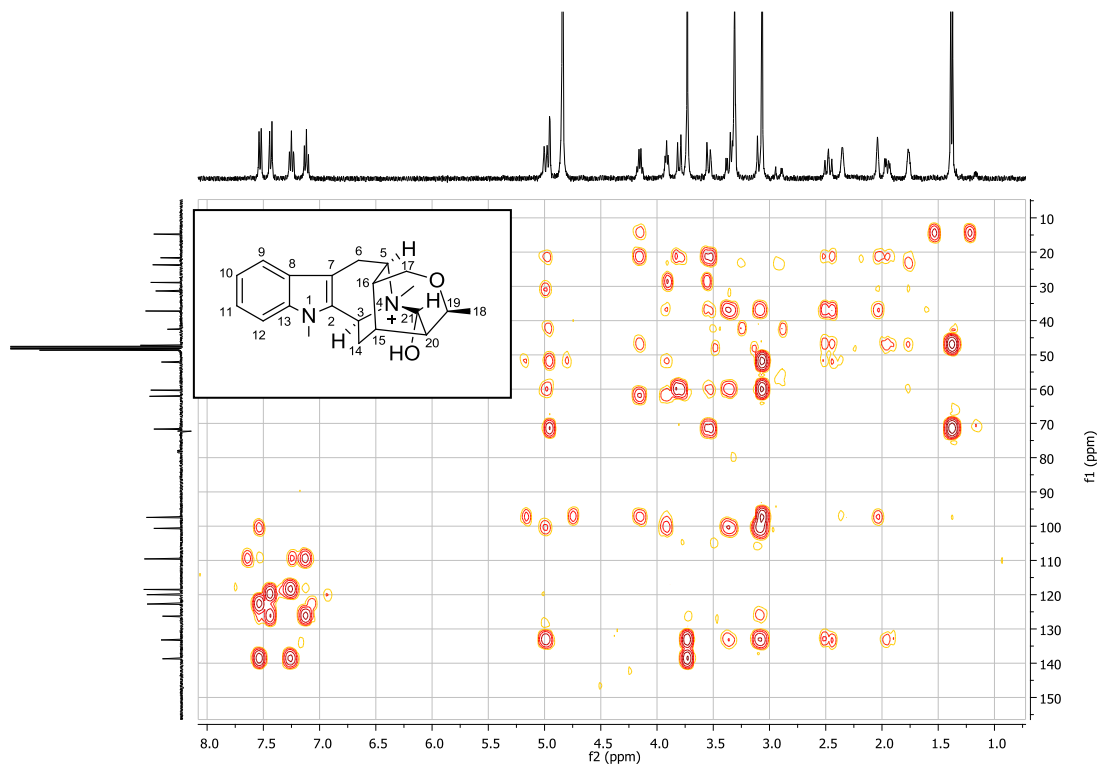

**Figure S1-6.**  $^1\text{H}$ - $^1\text{H}$  COSY spectrum of compound **1** ( $\text{CD}_3\text{OD}$ , 400 MHz).

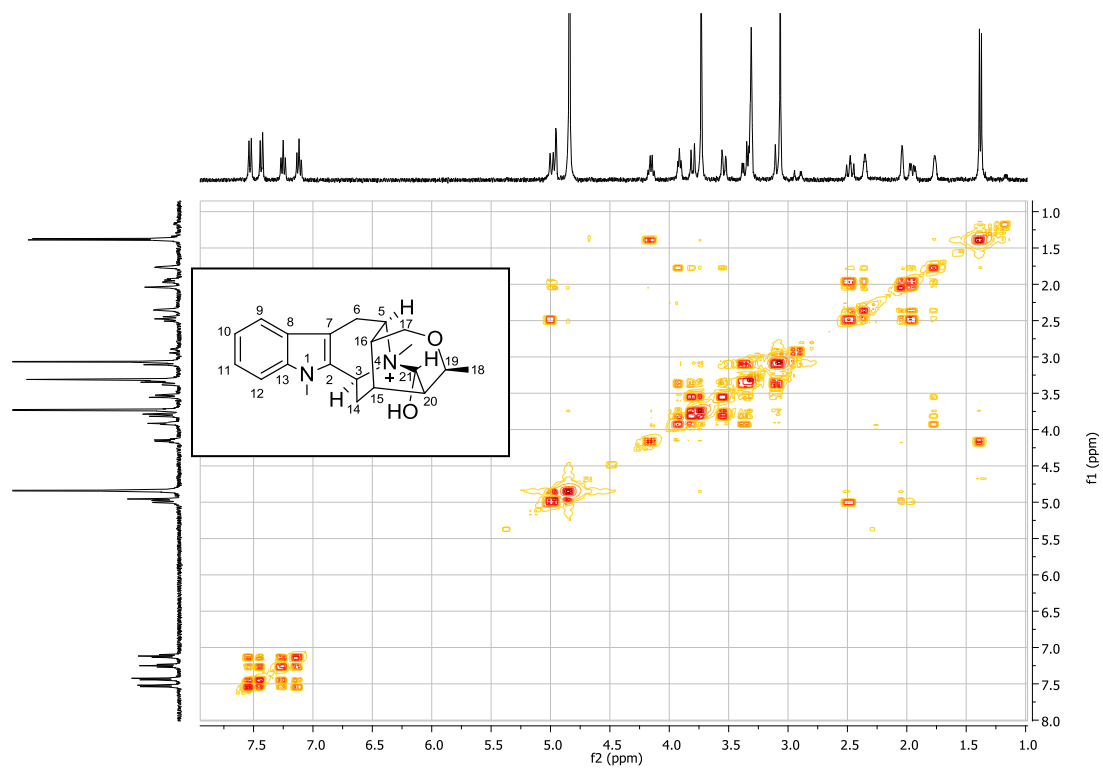

**Figure S1-7.** NOESY spectrum of compound **1** ( $\text{CD}_3\text{OD}$ , 400 MHz).

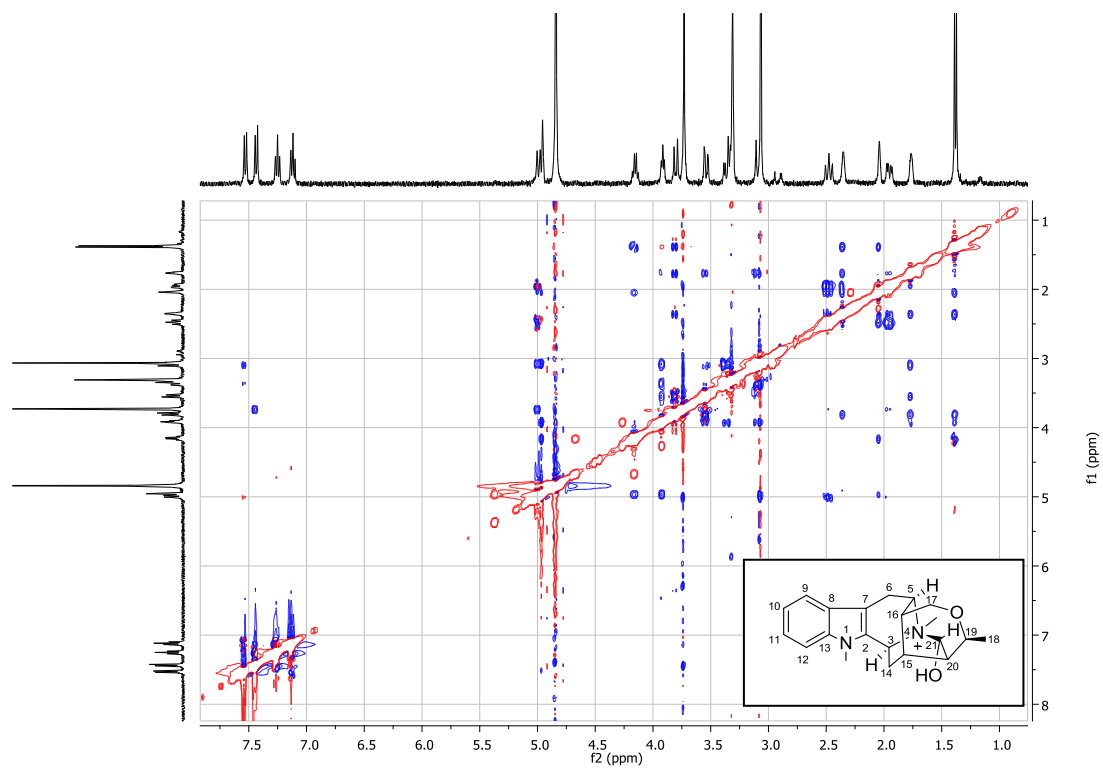

Figure S1-8. TOCSY spectrum of compound 1 (CD<sub>3</sub>OD, 400 MHz).

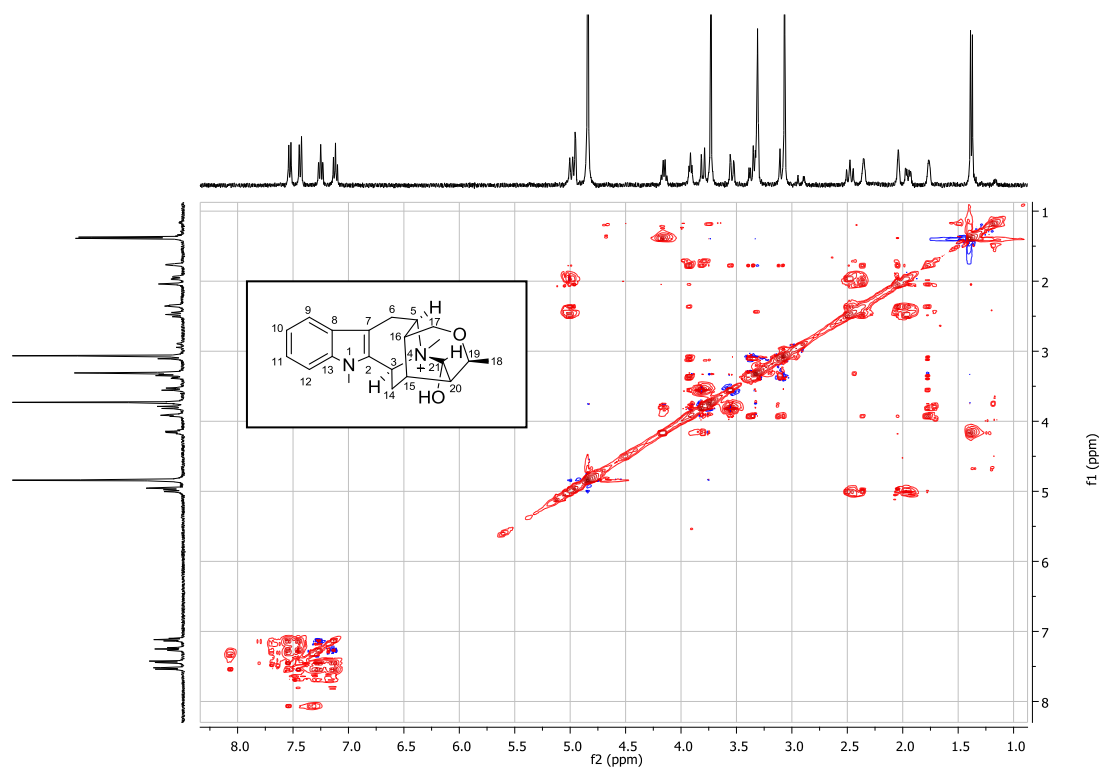

Figure S1-9. <sup>1</sup>H NMR spectrum of compound 2 (DMSO, 300 MHz).

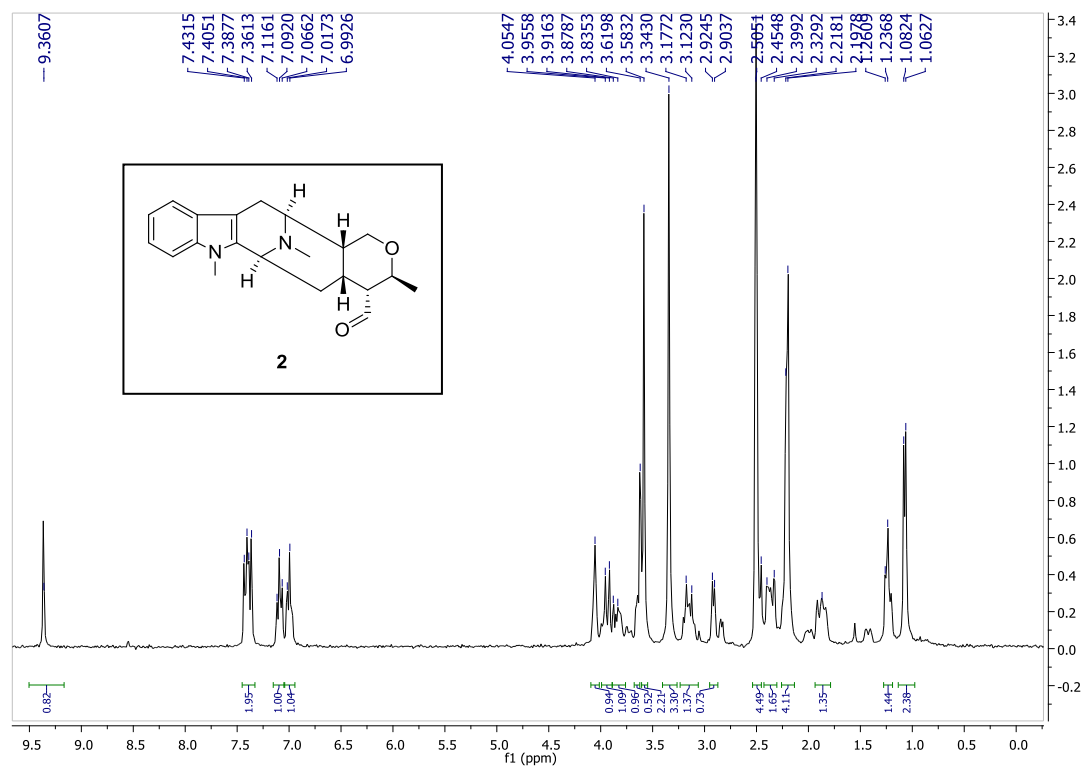

Figure S1-10.  $^1\text{H}$  NMR spectrum of compound **3** ( $\text{CDCl}_3$ , 400 MHz).

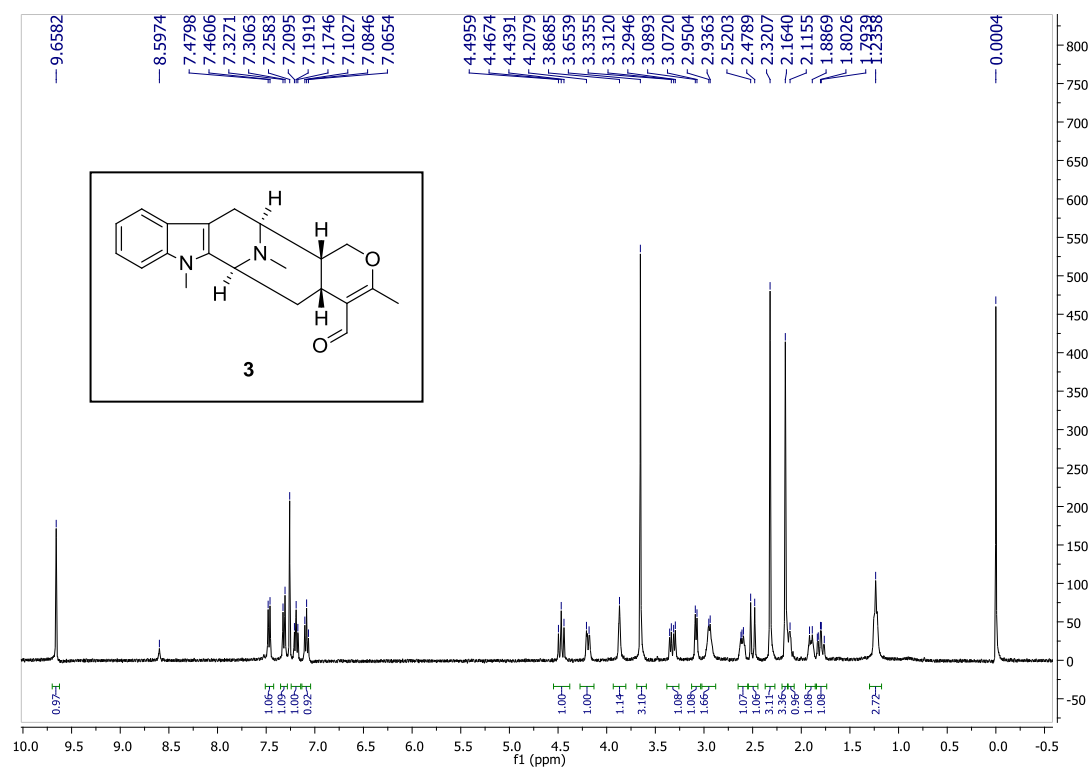

Figure S1-11.  $^1\text{H}$  NMR spectrum of compound **4** ( $\text{CDCl}_3$ , 300 MHz).

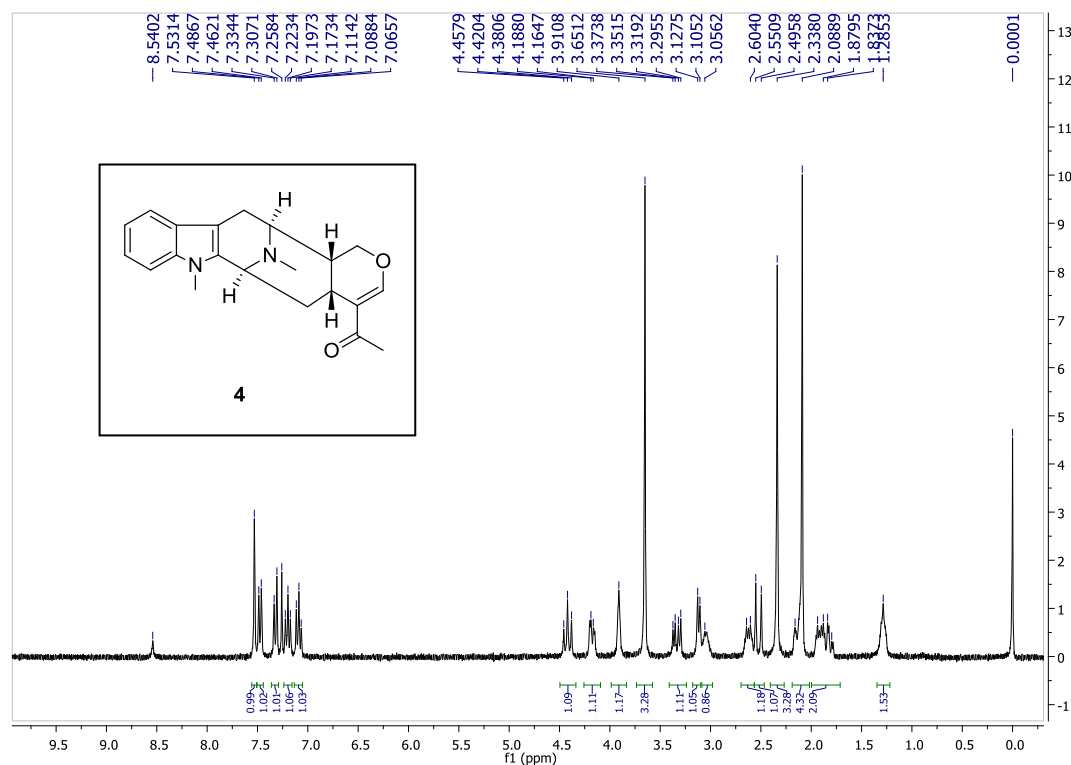



Figure S1-12.  $^1\text{H}$  NMR spectrum of compound **5** (DMSO, 400 MHz).

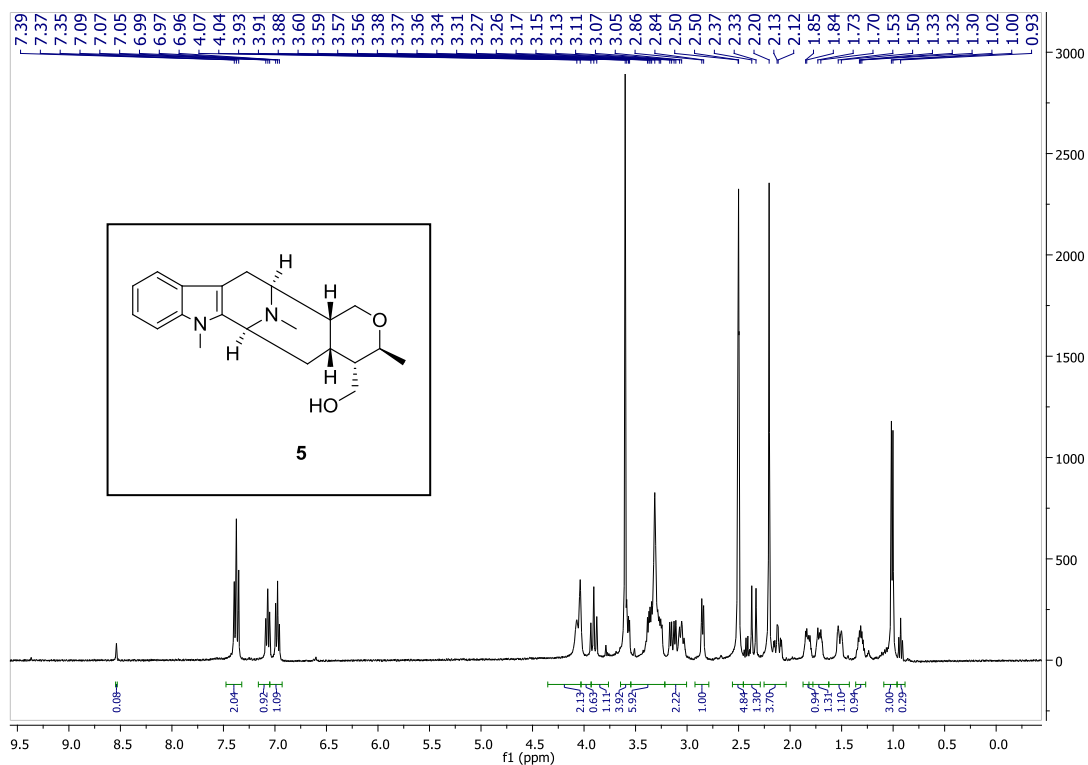

Figure S1-13.  $^1\text{H}$  NMR spectrum of compound **6** ( $\text{CDCl}_3$ , 400 MHz).

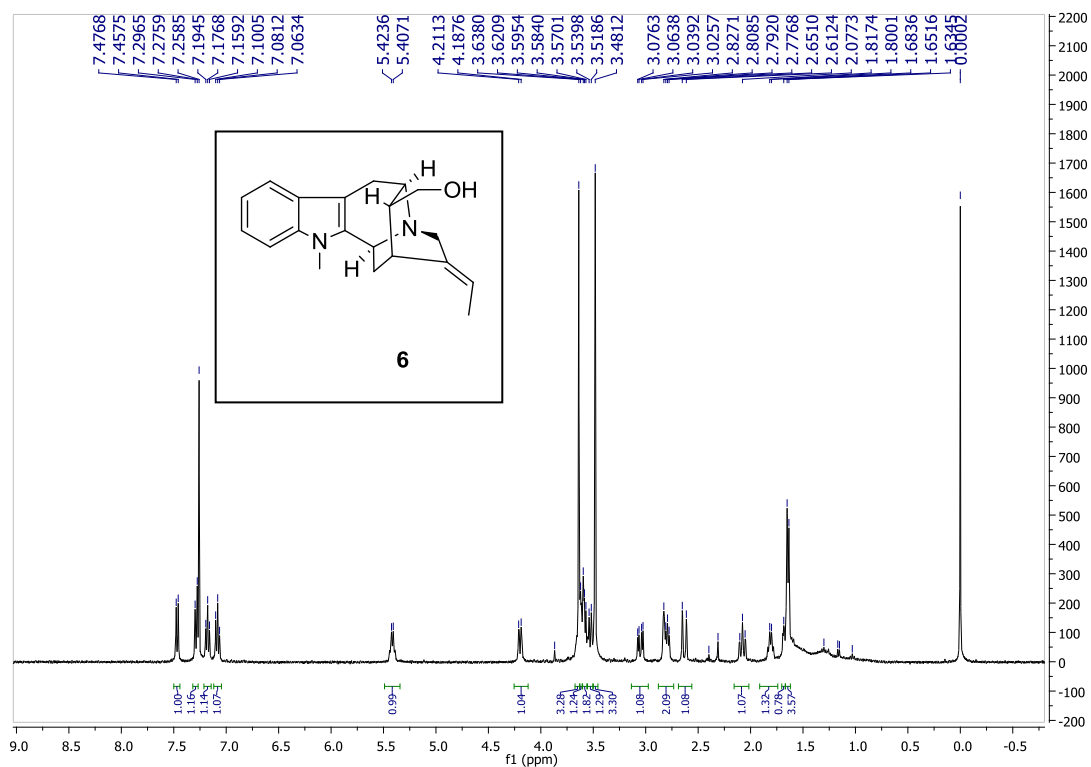

Figure S1-14.  $^1\text{H}$  NMR spectrum of compound **7** ( $\text{CDCl}_3$ , 400 MHz).

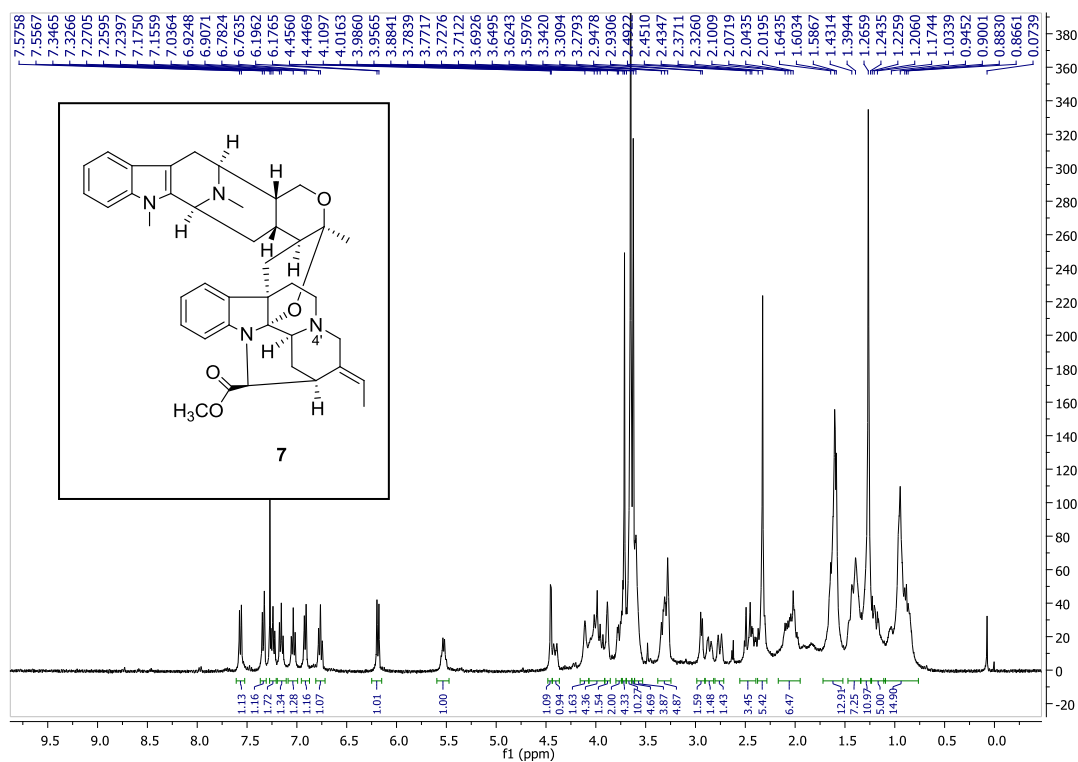

Figure S1-15.  $^1\text{H}$  NMR spectrum of compound **8** ( $\text{CD}_3\text{OD}$ , 400 MHz).

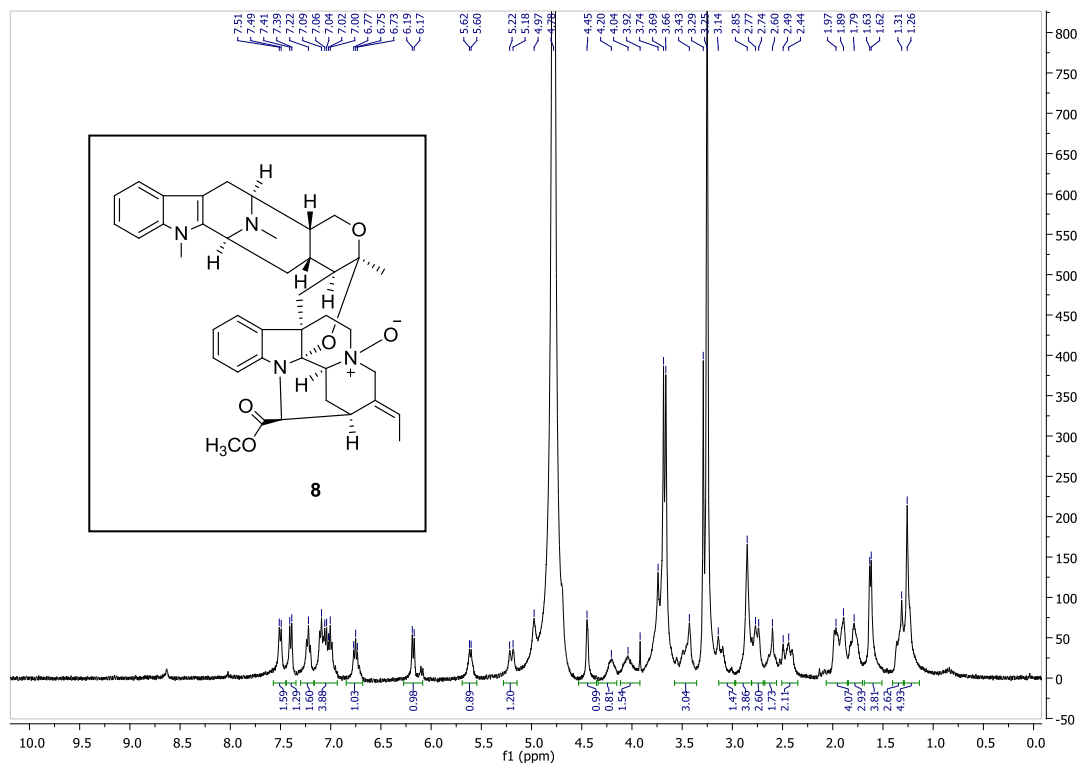

Figure S1-16.  $^1\text{H}$  NMR spectrum of compound **9** ( $\text{CD}_3\text{OD}$ , 400 MHz).

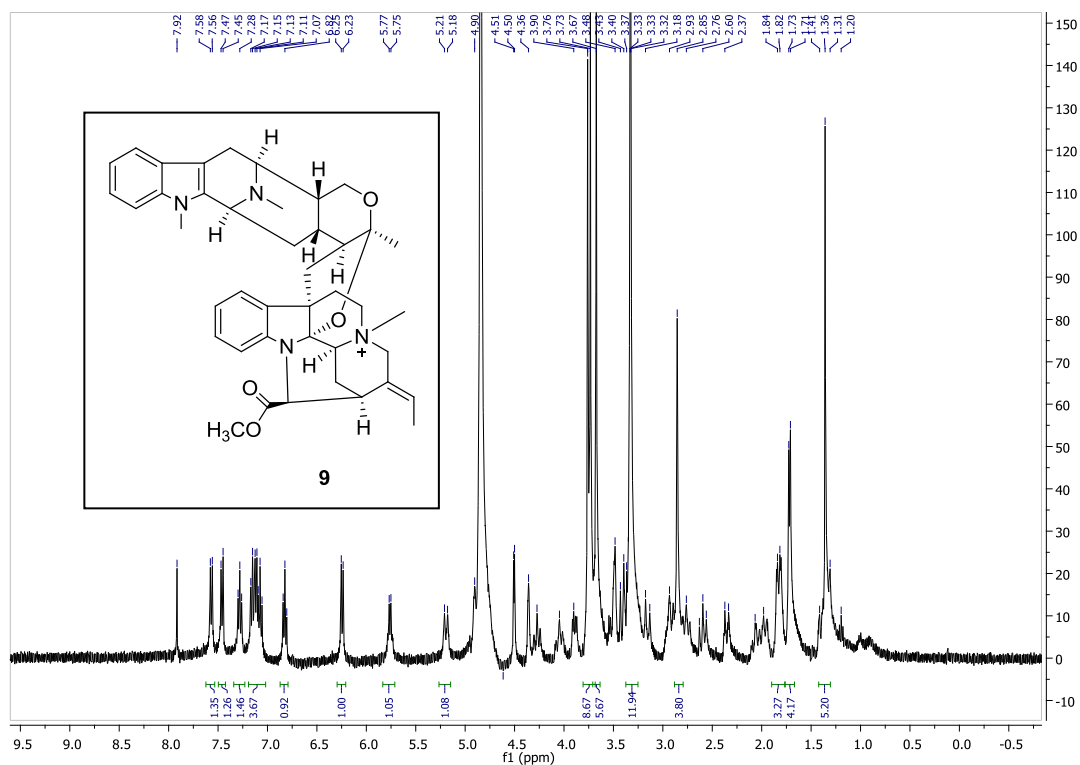

Figure S1-17.  $^1\text{H}$  NMR spectrum of compound **10** ( $\text{CDCl}_3$ , 400 MHz).

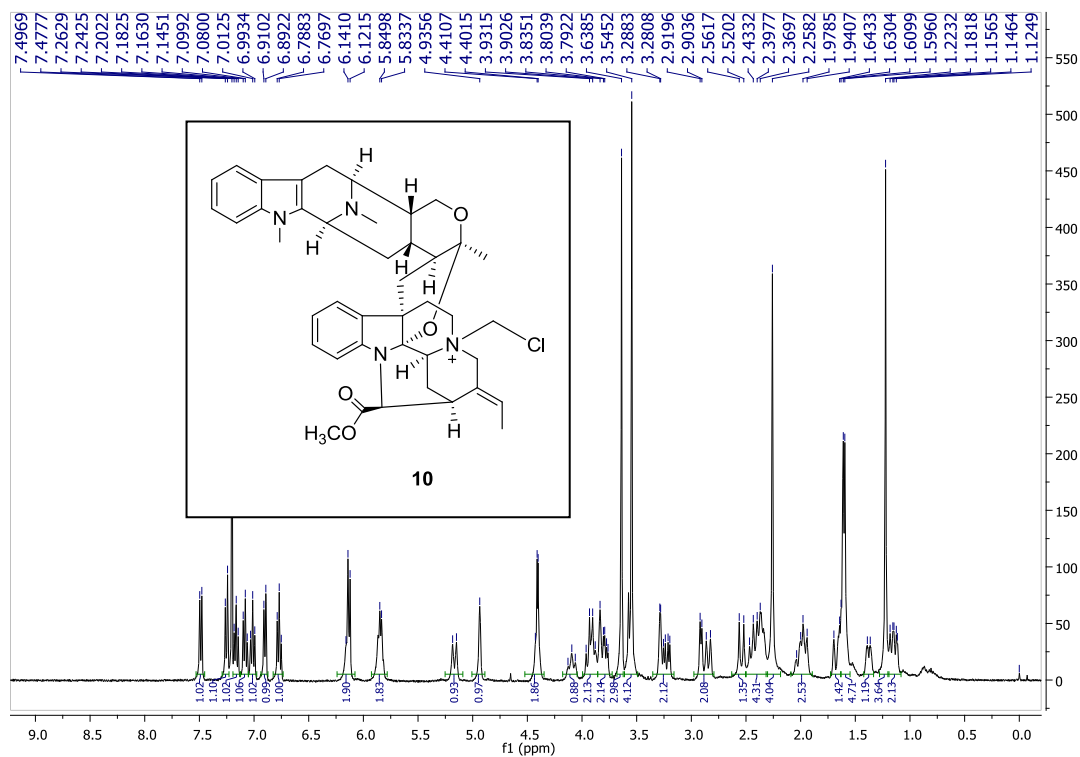

Supplement: NIHMS610360-supplement-01.pdf [file NIHMS610360-supplement-01.pdf]
